# Supplementary material
Source: PubMed Central journal article supplement (PMC2701668)
Supplement: NIHMS121491-supplement-01.pdf [file NIHMS121491-supplement-01.pdf]

Type of file: table

Label: TableDS1

Filename: TableDS1.pdf

## Data supplement

**Table DS1** DSM-IV disorders as risk factors for first onset of suicide-related outcomes

|                                            | Total sample (n=4274) |                  |                 |                             |                                |                                                        |                                                     |
|--------------------------------------------|-----------------------|------------------|-----------------|-----------------------------|--------------------------------|--------------------------------------------------------|-----------------------------------------------------|
|                                            | Ideation              | Plan             | Attempt         | Plan among ideators (n=353) | Attempt among ideators (n=363) | Attempt among ideators without a lifetime plan (n=199) | Attempt among ideators with a lifetime plan (n=154) |
|                                            | OR (95% CI)           | OR (95% CI)      | OR (95% CI)     | OR (95% CI)                 | OR (95% CI)                    | OR (95% CI)                                            | OR (95% CI)                                         |
| Anxiety disorder                           |                       |                  |                 |                             |                                |                                                        |                                                     |
| Panic disorder                             | 6.0* (2.5–14.3)       | 9.3* (3.4–25.9)  | 8.9* (2.9–27.1) | 2.6 (0.8–8.8)               | 1.1 (0.5–2.2)                  | 0.0* (0.0–0.0)                                         | 1.5 (0.6–3.5)                                       |
| Generalised anxiety disorder               | 5.1 (2.3–11.3)        | 5.7* (2.3–14.0)  | 4.7* (2.0–11.2) | 2.1 (0.7–5.9)               | 0.8 (0.3–2.3)                  | 1.5 (0.3–6.8)                                          | 1 (0.3–3.9)                                         |
| Social phobia                              | 3.3* (2.0–5.3)        | 2.8* (1.2–6.2)   | 3.8* (1.6–9.0)  | 0.9 (0.3–2.4)               | 1.2 (0.6–2.3)                  | 0.4 (0.0–3.1)                                          | 2.2 (0.8–5.8)                                       |
| Post-traumatic stress disorder             | 3.8* (1.0–13.9)       | 3.6* (1.3–9.8)   | 4.6* (1.6–13.3) | 1.9 (0.6–6.7)               | 1.8 (0.5–6.6)                  | 1.9 (0.4–8.3)                                          | 3.0 (0.5–16.8)                                      |
| Any anxiety disorder                       | 2.5* (1.7–3.6)        | 2.6* (1.5–4.7)   | 3.0* (1.8–4.9)  | 1.3 (0.7–2.4)               | 1.3 (0.8–2.2)                  | 1.1 (0.4–3.0)                                          | 2.3* (1.1–4.6)                                      |
| Mood disorder                              |                       |                  |                 |                             |                                |                                                        |                                                     |
| Major depressive episode                   | 3.3* (2.2–5.2)        | 3.3* (2.0–5.6)   | 3.1* (1.7–5.4)  | 1.0 (0.4–2.3)               | 0.8 (0.4–1.6)                  | 0.4 (0.1–1.7)                                          | 1.4 (0.6–3.3)                                       |
| Impulse-control disorder                   |                       |                  |                 |                             |                                |                                                        |                                                     |
| Intermittent explosive disorder            | 6.4* (4.3–9.5)        | 5.3* (2.4–11.6)  | 3.1* (1.2–8.0)  | 1.1 (0.4–2.8)               | 0.9 (0.3–2.5)                  | 0.0* (0.0–0.0)                                         | 1.5 (0.3–7.3)                                       |
| Substance use disorder                     |                       |                  |                 |                             |                                |                                                        |                                                     |
| Alcohol abuse                              | 2.9* (1.9–4.6)        | 3.7* (2.0–6.8)   | 2.9* (1.6–5.3)  | 1.8 (0.7–4.3)               | 0.9 (0.5–1.8)                  | 0.1 (0.0–1.4)                                          | 0.9 (0.3–2.5)                                       |
| Alcohol abuse with dependence <sup>a</sup> | 4.5* (1.8–11.2)       | 10.0* (4.3–23.3) | 5.9* (2.4–14.6) | 6.1* (3.3–11.4)             | 1.0 (0.4–2.9)                  | 1.5 (0.0–66.9)                                         | 0.7 (0.1–3.5)                                       |
| Drug abuse                                 | 2.4* (1.2–4.6)        | 5.3 (2.4–12.0)   | 5.0* (2.6–9.7)  | 6.9* (1.7–27.3)             | 1.8 (0.7–4.5)                  | 0.0* (0.0–0.0)                                         | 1.9 (0.6–6.3)                                       |
| Drug abuse with dependence <sup>b</sup>    |                       |                  |                 |                             |                                |                                                        |                                                     |
| Any substance use disorder                 | 3.1* (2.0–4.8)        | 4.2* (2.2–7.8)   | 4.1* (2.4–7.1)  | 1.9 (0.8–4.3)               | 1.5 (0.8–2.8)                  | 0.1 (0.0–1.3)                                          | 1.7 (0.6–4.5)                                       |
| Any disorder                               |                       |                  |                 |                             |                                |                                                        |                                                     |
| Any disorder                               | 3.5* (2.7–4.6)        | 4.0* (2.6–6.2)   | 4.0* (2.6–6.2)  | 1.3 (0.7–2.4)               | 1.3 (0.8–2.3)                  | 0.6 (0.2–1.8)                                          | 2.0 (0.9–4.3)                                       |
| Exactly one disorder                       | 1.3 (0.9–2.0)         | 0.8 (0.5–1.4)    | 1.4 (0.8–2.2)   | 0.5 (0.2–1.1)               | 1.7 (0.9–3.1)                  | 1.9 (0.6–6.1)                                          | 1.5 (0.5–5.1)                                       |
| Exactly two disorders                      | 3.2* (2.1–5.0)        | 4.3* (2.7–6.9)   | 2.9* (1.6–5.3)  | 1.9 (1.0–3.6)               | 0.7 (0.4–1.3)                  | 0.0* (0.0–0.0)                                         | 0.8 (0.4–1.8)                                       |
| Three disorders or more                    | 6.9* (4.2–11.5)       | 8.3* (4.3–15.8)  | 8.3* (4.8–14.2) | 1.8 (0.9–3.5)               | 1.5 (0.8–2.8)                  | 0.3 (0.1–1.8)                                          | 2.9 (1.1–7.8)                                       |

a. Assessed within age range 18–39 years.  
b. Disorder was omitted owing to insufficient lifetime cases (n<30), but is included as one of the disorders in the 'any disorder' category.  
\*P=0.05, two-sided test.
